# Supplementary material
Source: MDPI journal article supplement (https://www.mdpi.com/2076-3417/10/14/4823)
Supplement: s1 [file s1]

**Supplementary file A**

|  |  |
| --- | --- |

**Figure S5.** Simultaneous nitrification and aerobic denitrification performed by cyanide degrading consortia under high cyanide conditions.

| **A** |
| --- |
| **B** |
| **C** |
| **D** |
| **E** |

**Figure S6.** Metagenomics report for the consortium. (**A**) Kingdom classification. (**B**) Phylum classification. (**C**) Class classification. (**D**) Order classification. (**E**) Family classification.

| Monod |  |  |
| --- | --- | --- |
| Moser |  |  |
|  |  |  |

**Figure S7.** Parity plots of predicted values versus experimental values. Assimilations of the model data into NH4-N degradation experimental data (Monod and Moser).

| Monod |  |  |
| --- | --- | --- |
| Moser |  |  |

**Figure S8.** Parity plots of predicted values versus experimental values. Assimilations of the model data into CN- degradation experimental data (Monod, Moser and Andrews).

**Table S4.** Estimated values of kinetic parameters for the models for NH4-N degradation, a limiting step in nitrification

|  | Fitting constants and the values of kinetic Parameter (±95% confidence interval) | | | |  |  |
| --- | --- | --- | --- | --- | --- | --- |
| Model | *Vm (h-1)* | *Ki (mgL-1)* | *Ks (mgL-1)* | *N (-)* | *R2* | *variance* |
| Monod | - 1.19 | 92.91 | - | - | 0.48 | 0.09 |
| Moser | 0.26 | 1.55 | - | -0.24 | 0.09 | 0.23 |

**Table S5.** Estimated values of kinetic parameters for the models for CN- degradation, a limiting step in nitrification

|  | Fitting constants and the values of kinetic parameter  (±95% confidence interval) | | | | | | | | | |  |  | |
| --- | --- | --- | --- | --- | --- | --- | --- | --- | --- | --- | --- | --- | --- |
| Model | *Vm (h-1)* | | *Ki (mgL-1)* | | *Ks (mgL-1)* | | | *n (-)* | | *R2* | | variance | |
| Monod | -0.32 | | -9.50 | | - | | | - | | 0.28 | | 0.48 | |
| Moser | 0.026 | | 44.43 | | - | | 0.98 | | | 0.75 | | 0.22 | |
| Model with substrate inhibition | | | | | | | | | | | | | |
| Andrews | | -0.29 | | -1.39 | 43.42 | - | | | -0.99 | | | | 1.75 |
